# Supplementary material for: Honey Varietals Differentially Impact Bifidobacterium animalis ssp. lactis Survivability in Yogurt through Simulated In Vitro Digestion
Source: PubMed Central journal article supplement — J Nutr. 2024 Jan 12;154(3):866–74. doi: 10.1016/j.tjnut.2024.01.010 (PMC10942848; doi:10.1016/j.tjnut.2024.01.010), 2024-01-12
Supplement: mmc1.pdf [file mmc1.pdf]

## Online Supplemental Materials

Alvarado et al. Honey varietals differentially impact *Bifidobacterium animalis* ssp *lactis* survivability in yogurt through simulated *in vitro* digestion

## Supplementary Figures

**Supplemental Figure 1. Effect of honey varietals (20% w/w) and controls on *B. animalis* survivability in yogurt (170g) through simulated *in vitro* digestion**

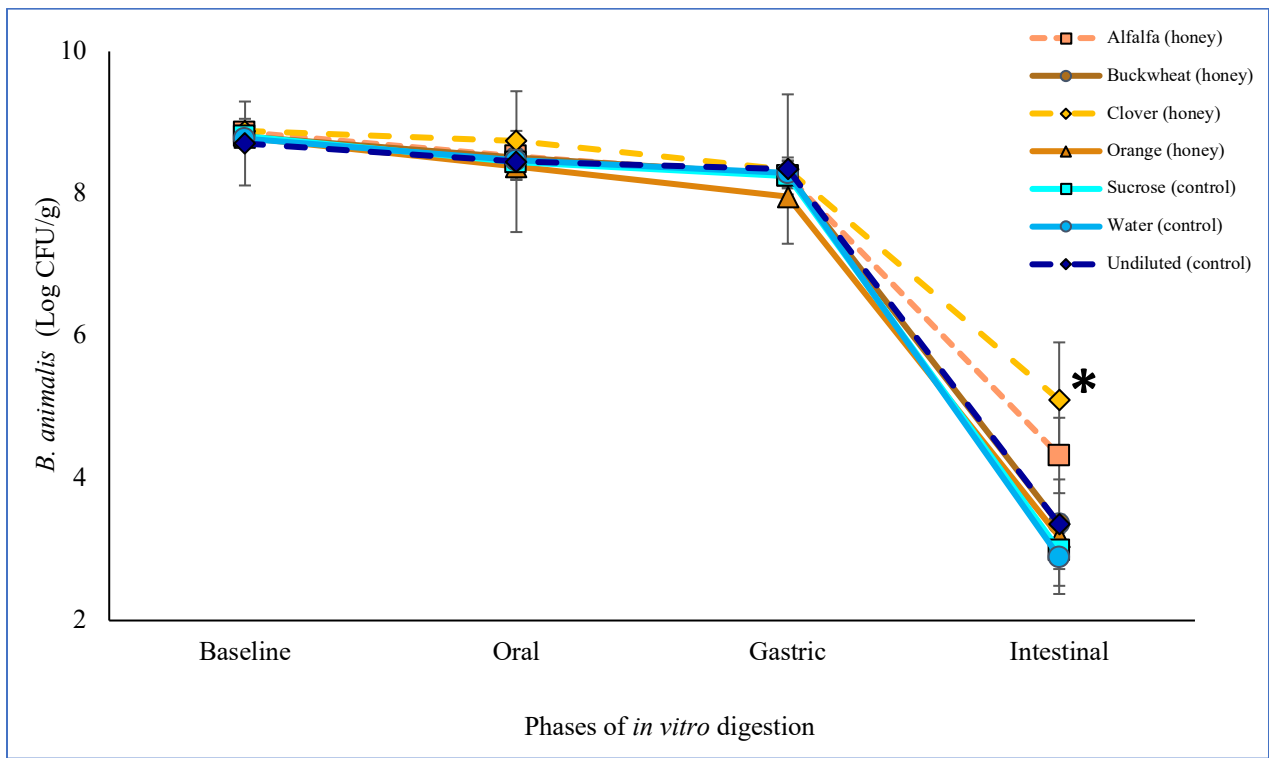

\* Indicates significantly different from the control (undiluted yogurt) using Dunnett's test (P < 0.05)

**Supplemental Figure 2. Associations between *B. animalis* survivability post-intestinal digestion and honey components**

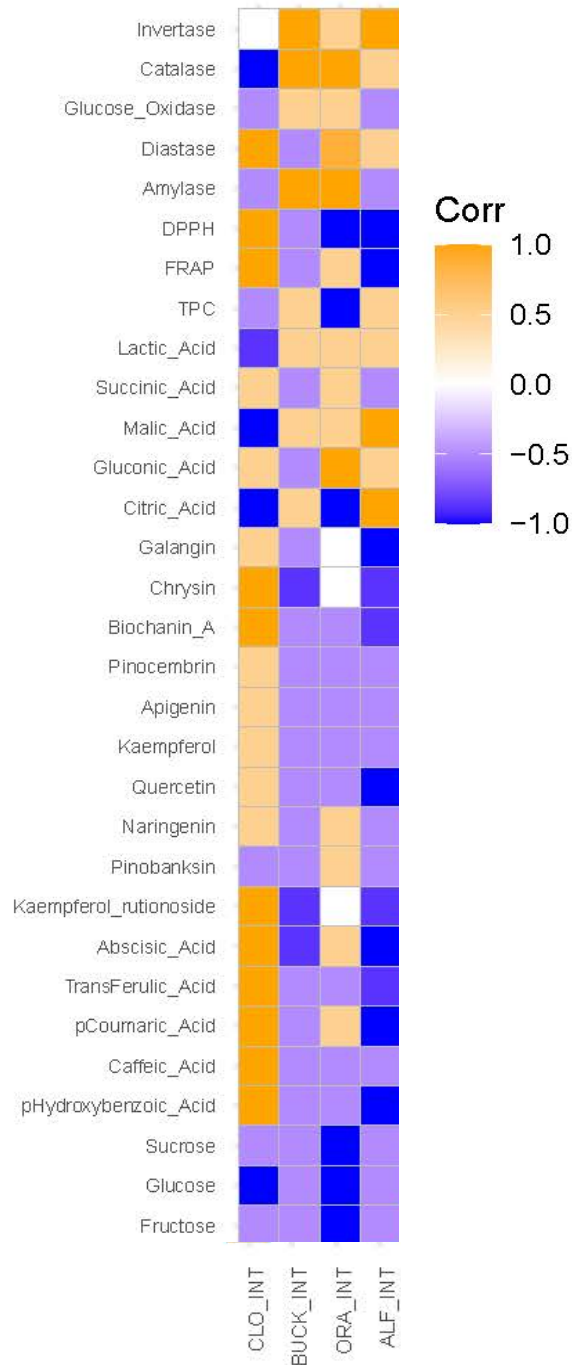

Heatmap displaying the results of Spearman correlational analysis between probiotic survival following the intestinal phase with each honey varietal and all the measured components of the honey. CLO\_INT = clover intestinal survivability, BUCK = buckwheat, ORA = orange blossom, ALF = alfalfa

**Supplemental Figure 3. Associations between honey compounds and post-intestinal survivability of *B. animalis***

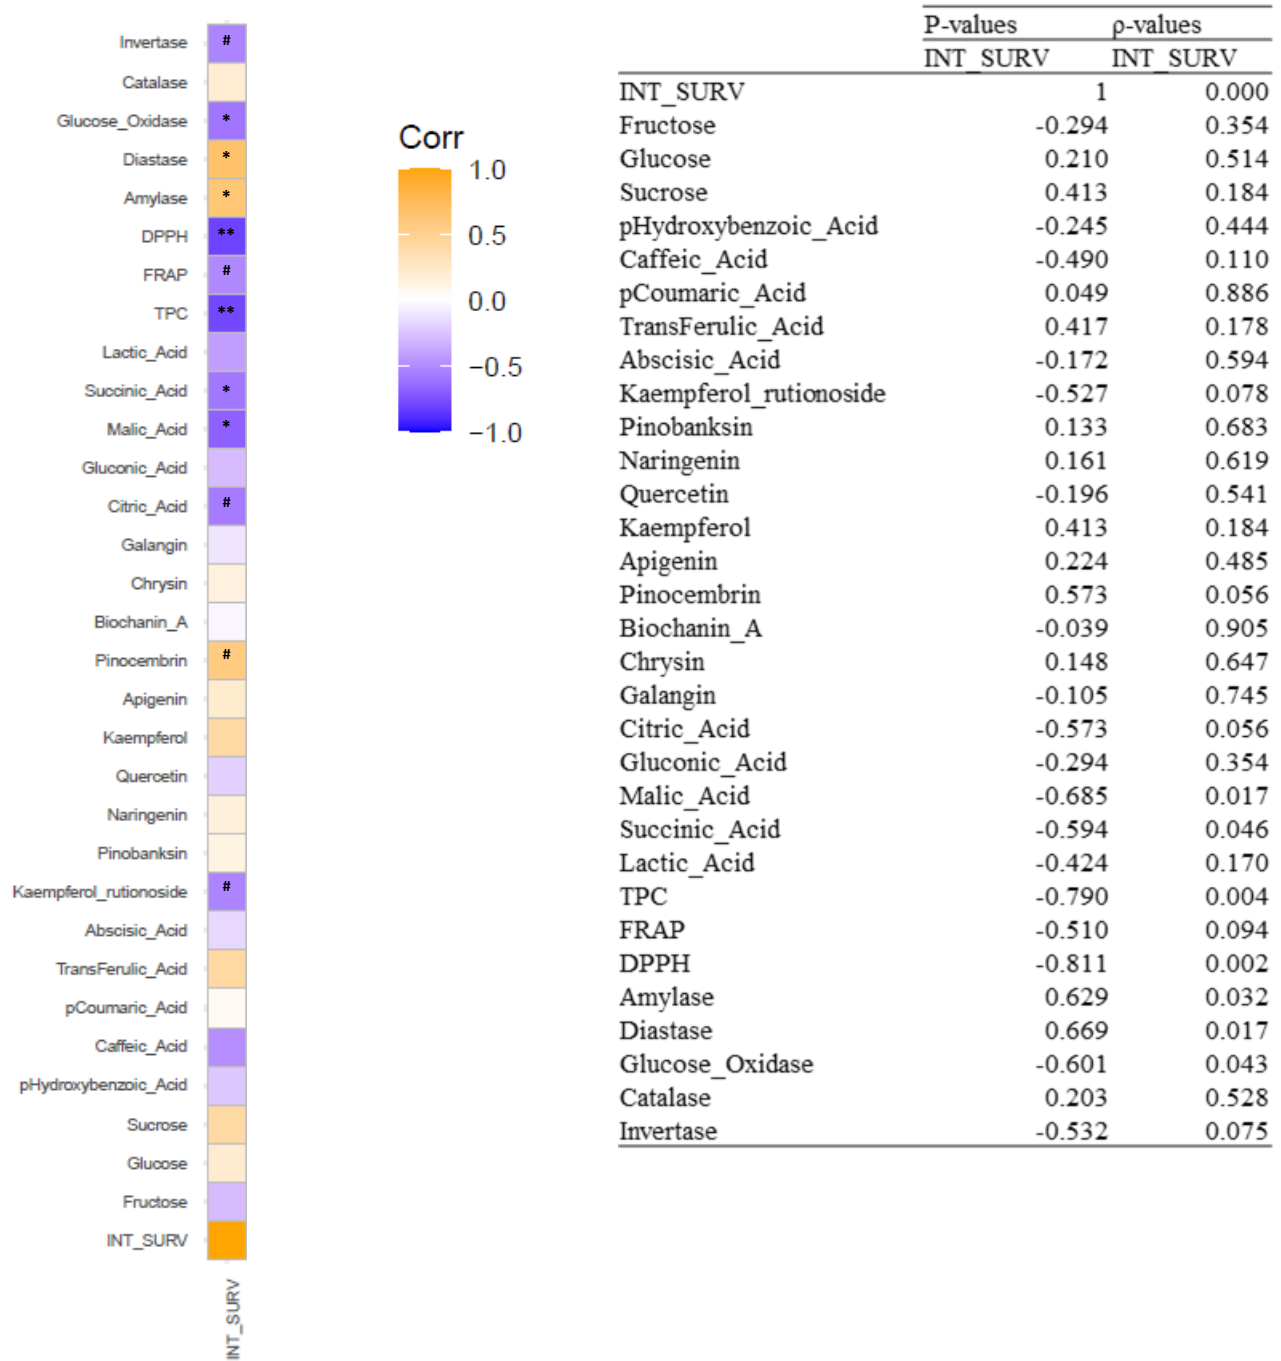

Heatmap visualizing associations between honey components from Table 2 and intestinal survivability of *B. animalis*. Statistical analysis was conducted using Spearman’s rank correlation. ( $P < 0.1 = \#$ ,  $P < 0.05 = *$ ,  $P < 0.01 = **$ ). CLO\_INT = clover intestinal survivability, BUCK = buckwheat, ORA = orange blossom, ALF = alfalfa. TPC=Total Phenolic Content; FRAP=Ferric-reducing antioxidant power; DPPH=2,2-Diphenyl 1-1-picrylhydrazyl

Supplemental Figure 4. Effect of clover honey at different dosages on *B. animalis* survivability in yogurt (170g) through simulated in vitro digestion

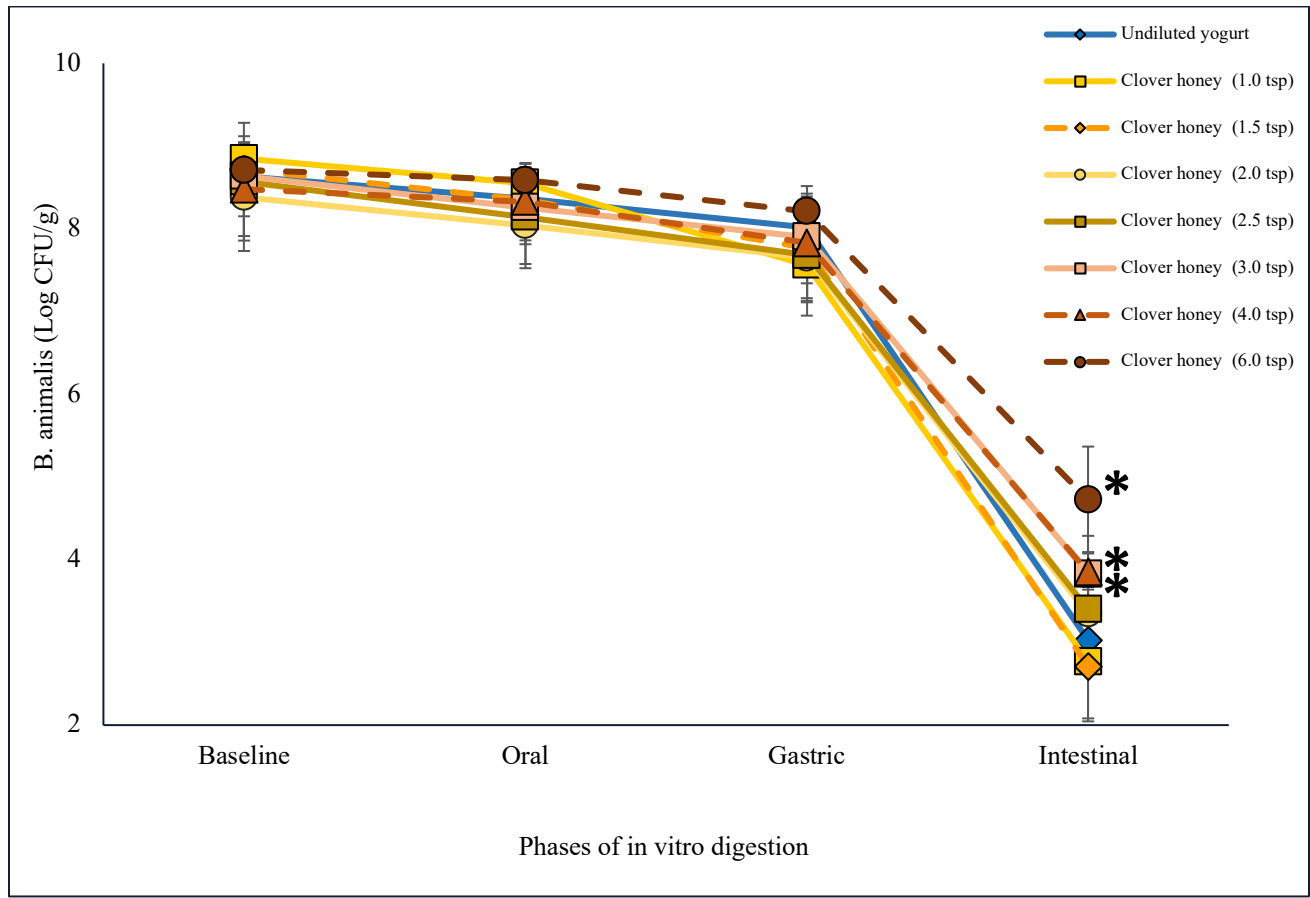

\* Indicates significantly different from the control (undiluted yogurt) using Dunnett's test ( $P < 0.05$ )

## Supplementary Tables

**Supplemental Table 1:** Nutritional and microbial composition of the commercial yogurt.

| Activia Low-Fat<br>Vanilla Yogurt (113g) |     |
|------------------------------------------|-----|
| Energy, kcal                             | 90  |
| Nutrient                                 |     |
| Total Fat, g                             | 1.5 |
| Saturated Fat, g                         | 1   |
| Cholesterol, mg                          | 5   |
| Sodium, mg                               | 55  |
| Total                                    |     |
| Carbohydrate, g                          | 15  |
| Dietary Fiber, g                         | 0   |
| Total Sugars, g                          | 12  |
| Added Sugars, g                          | 8   |
| Protein, g                               | 4   |
| Potassium, mg                            | 170 |
| Calcium, mg                              | 140 |
| Vitamin D, $\mu$ g                       | 1.7 |
| Iron, mg                                 | 0.1 |

Activia ®. Live cultures: *L. Bulgaricus*, *L. Lactis*,  
*S. Thermophilus* Live and Active: *B. Lactis*  
DN173-010/CNCM I-2494

| <b>Supplemental Table 2. Additional Sugar properties (mean ± SD)</b> |           |               |                  |               |                |
|----------------------------------------------------------------------|-----------|---------------|------------------|---------------|----------------|
|                                                                      | Units     | <b>Clover</b> | <b>Buckwheat</b> | <b>Orange</b> | <b>Alfalfa</b> |
| Total available carbohydrates                                        | mg/100 mg | 73.7 ± 1.07   | 71.1 ± 3.62      | 70.7 ± 1.09   | 69.5 ± 3.04    |
| Moisture                                                             | Percent   | 17.7 ± 0.42   | 19.2 ± 0.72      | 17. ± 0.46    | 17 ± 0.00      |
| Total carbohydrates P-S method                                       | mg/100 mg | 78.5 ± 2.73   | 78.9 ± 2.52      | 78.3 ± 2.27   | 79.3 ± 5.23    |

| <b>Supplemental Table 3. Honey physicochemical (mean ± SD)</b> |                      |               |                  |               |                |
|----------------------------------------------------------------|----------------------|---------------|------------------|---------------|----------------|
|                                                                | Units                | <b>Clover</b> | <b>Buckwheat</b> | <b>Orange</b> | <b>Alfalfa</b> |
| Free acidity                                                   | mmol acid/kg         | ND            | ND               | ND            | ND             |
| Electrical conductivity                                        | µsm/cm               | ND            | ND               | ND            | ND             |
| Colour                                                         | absorbance at 560 nm | 3.12 ± 0.18   | 5 ± 0            | 0.72 ± 0.01   | 0.42 ± 0.02    |
| USDA Colour Designation                                        | Colour               | Dark Amber    | Dark Amber       | Amber         | Light Amber    |
| HMF                                                            | mg/100 g             | 0.358±0.056   | 0.192±0.035      | 0.290±0.007   | 0.544±0.112    |
| HMF                                                            | mg/kg                | ND            | ND               | ND            | ND             |
| Ash                                                            | Percent              | 0.13±0.003    | 0.43±0.16        | 0.09±0.02     | 0.11 ± 0.02    |
| Total protein                                                  | mg/100g honey        | 38.5 ± 0.51   | 148 ± 2.36       | 33.0 ± 1.20   | 45.4 ± 1.68    |
| <i>Not detectable (ND)</i>                                     |                      |               |                  |               |                |

| <b>Supplemental Table 4. Additional Organic acids (mean ± SD)</b> |         |               |                  |               |                |
|-------------------------------------------------------------------|---------|---------------|------------------|---------------|----------------|
|                                                                   | Units   | <b>Clover</b> | <b>Buckwheat</b> | <b>Orange</b> | <b>Alfalfa</b> |
| Maleic acid                                                       | mg/100g | ND            | ND               | ND            | ND             |
| Malonic acid                                                      | mg/100g | ND            | ND               | ND            | ND             |
| <i>Not detectable (ND)</i>                                        |         |               |                  |               |                |
